# Supplementary material for: Exploring Student Perspectives of the Dietetics Profession Using a Professional Socialization Lens
Source: Atypon-hosted journal article supplement (doi:10.3148/cjdpr-2024-008), 2024-08-06
Supplement: cjdpr-2024-008suppla.pdf [file cjdpr-2024-008suppla.pdf]

## Supplemental File Interview Guide

1. Why were you interested in participating in the study?
2. What (U of M will specify 'nutrition'/Lakehead will specify 'food') courses have you taken?
3. How is food described in the (U of M will specify 'nutrition'/Lakehead will specify 'food') classes you have taken?
  - By instructors?
  - By students?
4. How is eating described in your classes?
  - By instructors?
  - By students?
5. How is food preparation described in your classes?
  - By instructors?
  - By students?
6. How is food production described in your classes?
  - By instructors?
  - By students?
7. What qualities of food are described/emphasized?
  - By instructors?
  - By students?
8. What qualities of eating are described/emphasized?
  - By instructors?
  - By students?
9. What qualities of food preparation are described/emphasized?
  - By instructors?
  - By students?
10. What qualities of food production are described/emphasized?
  - By instructors?
  - By students?
11. What effects of eating are described/emphasized?
  - By instructors?
  - By students?
12. What effects of food preparation are described/emphasized?
  - By instructors?
  - By students?
13. What effects of food production are described/emphasized?
  - By instructors?
  - By students?
14. How were inequities pertaining to food and eating addressed in your classes?
  - Gender inequalities?
  - Class inequities?
  - Racial inequities?
  - Colonialism?
  - By instructors?
  - By students?
15. What do you think is the take-away message about food from your classes?
16. What do you think is the take-away message about eating from your classes?
